# Supplementary material
Source: ML conference proceedings conference paper supplement (https://openaccess.thecvf.com/content/WACV2024/html/Kapitanov_HaGRID_--_HAnd_WACV_2024_paper.html)
Supplement: Supplementary file 1 [file Kapitanov_HaGRID_--_HAnd_WACV_2024_supplemental.pdf]

## Supplementary materials

| Gesture                               | Applications                                                                                                                                                                                                                                                 | Gesture | Applications                                                                                                                                                                                          |
|---------------------------------------|--------------------------------------------------------------------------------------------------------------------------------------------------------------------------------------------------------------------------------------------------------------|---------|-------------------------------------------------------------------------------------------------------------------------------------------------------------------------------------------------------|
| one, peace, three, three2, four, palm | numeric value input, e.g. volume scale, light level, etc., also possible their combinations for range extension                                                                                                                                              | call    | <ul style="list-style-type: none"> <li>– incoming call acceptance</li> <li>– making a call on the intercom in the smart home</li> </ul>                                                               |
| like, dislike                         | <ul style="list-style-type: none"> <li>– like / dislike or save/remove something (e.g. music track or video)</li> <li>– evaluating content to improve recommendations</li> <li>– expressing approval/disapproval for videoconference participants</li> </ul> | mute    | <ul style="list-style-type: none"> <li>– switching applications to silent mode</li> <li>– mute the microphone during a videoconference</li> <li>– switching the smart home to “night mode”</li> </ul> |
| stop, stop inverted                   | <ul style="list-style-type: none"> <li>– stop something (e.g. music or video playback)</li> <li>– swipe to scroll content when combined with the gesture “stop inverted”</li> </ul>                                                                          | ok      | <ul style="list-style-type: none"> <li>– command confirmation</li> <li>– confirmation of smart home mode switching</li> </ul>                                                                         |
| peace, peace inverted                 | <ul style="list-style-type: none"> <li>– switching the smart home to relax mode</li> <li>– activation something</li> <li>– rotation of the object when combined with the gesture “peace inverted”</li> </ul>                                                 | fist    | <ul style="list-style-type: none"> <li>– expressing applause, approval or encouragement for videoconference participants</li> <li>– dragging objects when combined with the gesture “palm”</li> </ul> |
| two up, two up inverted               | <ul style="list-style-type: none"> <li>– swipe to scroll content when combined with the gesture “two up inverted”</li> </ul>                                                                                                                                 | rock    | <ul style="list-style-type: none"> <li>– launching entertainment mode for smart home</li> <li>– changing the numerical value of any smart home/application characteristic to a maximum</li> </ul>     |

Table 4. Possible uses of gestures. Gesture “three2” has the same meaning as the gesture “three” as the last is inconvenient to show by some people.

| Model       | Weight Decay | Learning Rate | Scheduler         | Scheduler’ Params.        |
|-------------|--------------|---------------|-------------------|---------------------------|
| ResNet      | $1^{-4}$     | $1^{-1}$      | ReduceLROnPlateau | mode: min, factor: 0.1    |
| MobileNetV3 | $5^{-4}$     | $5^{-3}$      | StepLR            | step size: 30, gamma: 0.1 |
| VitB16      | $5^{-4}$     | $5^{-3}$      | CosineAnnealingLR | T max: 8                  |
| RetinaNet   | $1^{-4}$     | $1^{-2}$      | StepLR            | step size: 30, gamma: 0.1 |
| SSDLite     | $5^{-4}$     | $1^{-3}$      | StepLR            | step size: 30, gamma: 0.1 |
| YoloV7      | $5^{-4}$     | $1^{-2}$      | LambdaLR          | sinusoidal function       |

Table 5. Training hyperparameters.

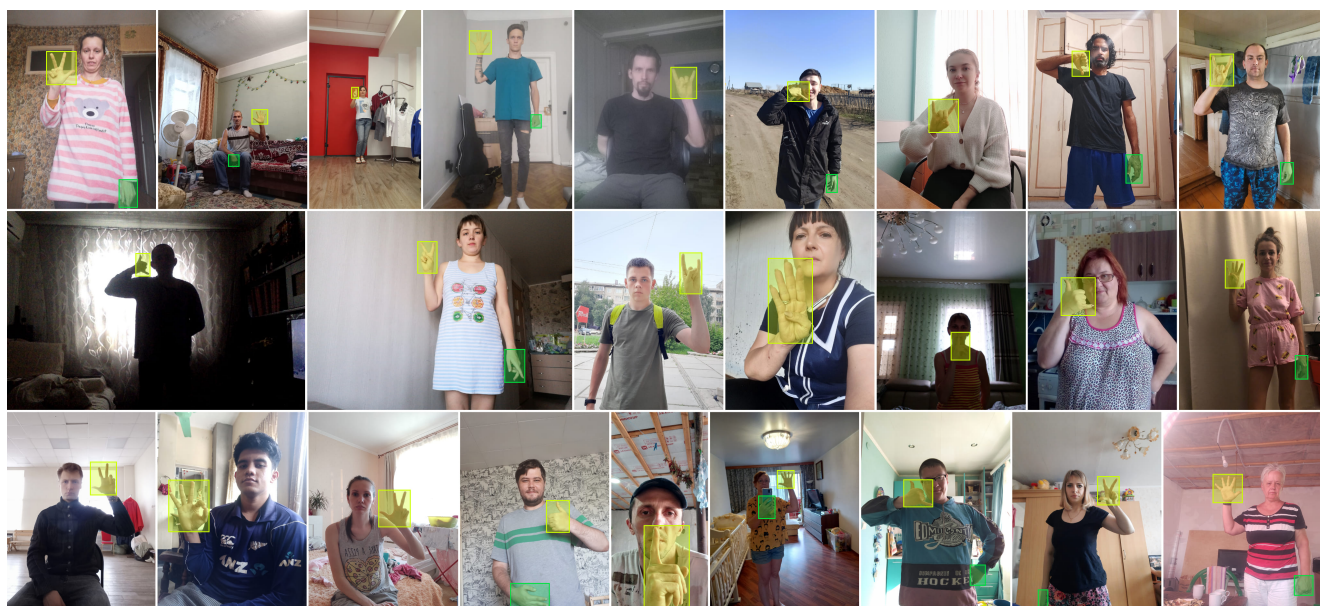

Figure 5. Examples of labeled samples from HaGRID. Gestures and “no gestures” are highlighted in yellow and green bounding boxes, respectively.
